# Supplementary material for: Expression of Concern: Potential Tumor Suppressor NESG1 as an Unfavorable Prognosis Factor in Nasopharyngeal Carcinoma
Source: PLOS journal article supplement (doi:10.1371/journal.pone.0231298), 2020-04-13
Supplement: S1 (10.1371/journal.pone.0231298.s001) [file journal.pone.0231298.s001]

Figure 1. STR profiles of HONE1 cell line

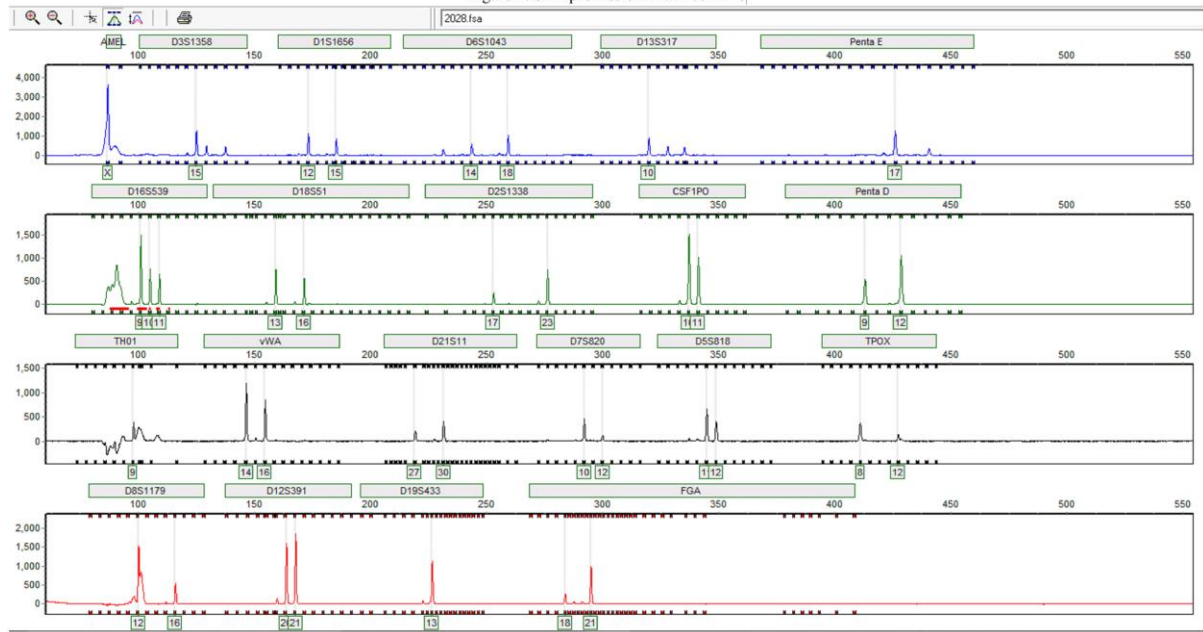

Table 1. STR profiles of HONE1 cell line

|         | Allele1 | Allele2 | Allele3 |
|---------|---------|---------|---------|
| AMEL    | x       |         |         |
| D3S1358 | 15      |         |         |
| D1S1656 | 12      | 15      |         |
| D6S1043 | 14      | 18      |         |
| D13S317 | 10      |         |         |
| Penta E | 17      |         |         |
| D16S539 | 9       | 10      | 11      |
| D18S51  | 13      | 16      |         |
| D2S1338 | 17      | 23      |         |
| CSF1PO  | 10      | 11      |         |
| Penta D | 9       | 12      |         |
| TH01    | 9       |         |         |
| vWA     | 14      | 16      |         |
| D21S11  | 27      | 30      |         |
| D7S820  | 10      | 12      |         |
| D5S818  | 11      | 12      |         |
| TPOX    | 8       | 12      |         |
| D8S1179 | 12      | 16      |         |
| D12S391 | 20      | 21      |         |
| D19S433 | 13      |         |         |
| FGA     | 18      | 21      |         |

Figure 2. Search result in ATCC database

## SEARCH THE STR DATABASE

As part of our continuing efforts to characterize and authenticate the cell lines in the Cell Biology collection, ATCC has developed a comprehensive database of short tandem repeat (STR) DNA profiles for all of our human cell lines. [View our brief tutorial before starting.](#)

1. [STR Profiling Analysis](#)
2. [Matching Algorithm](#)
3. [Interrogating the Database](#)

There are no results.

**Disclaimer:** Reference to this database and the data contained therein may be cited in publications, and ATCC encourages such citation or reference. While every reasonable effort has been made to assure the accuracy of these data, no warranty, express or implied, is made by ATCC as to their accuracy.

Figure 3. Search result in DSMZ database

Result of STR matching analysis by your data.

- DSMZ Profile Database -

A graphical presentation is shown at the bottom of this page.

| EV | Cell No.          | Cell name | Locus names |         |           |         |      |      |       |        | Figures |
|----|-------------------|-----------|-------------|---------|-----------|---------|------|------|-------|--------|---------|
|    |                   |           | D5S818      | D13S317 | D7S820    | D16S539 | VWA  | TH01 | AME   | TPOX   |         |
|    | Query (Your Cell) | 11, 12    | 10, 10      | 10, 12  | 9, 10, 11 | 14, 16  | 9, 9 | x, x | 8, 12 | 10, 11 |         |

Figure 4. Authentication of the species of the sample

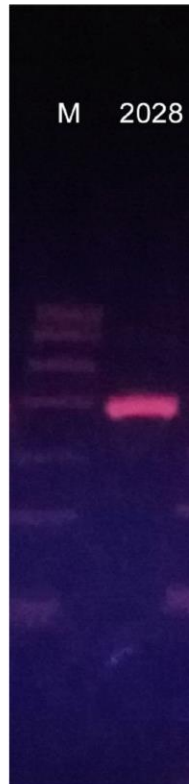

M: Marker. As the size of 700, 600, 500, 400, 300, 200 and 100bp from up to down.

Nine species are checked, as follow: *Homo sapiens* 391bp, *Cricetulus griseus* 315bp, *Macaca mulatta* 287bp, *Cercopithecus aethiops* 222bp, *Rattus norvegicus* 196bp, *Canis familiaris* 172bp, *Mus musculus* 150bp, *Bos Taurus* 102bp, IC 70bp

JD2028: The sample. The band size is 391bp which matches the size of human.
