# Supplementary material for: Expression of Concern: Potential Tumor Suppressor NESG1 as an Unfavorable Prognosis Factor in Nasopharyngeal Carcinoma
Source: PLOS journal article supplement (doi:10.1371/journal.pone.0231298), 2020-04-13
Supplement: S1 (10.1371/journal.pone.0231298.s001) [file journal.pone.0231298.s001]

Figure 1. STR profiles of 5-8F cell line

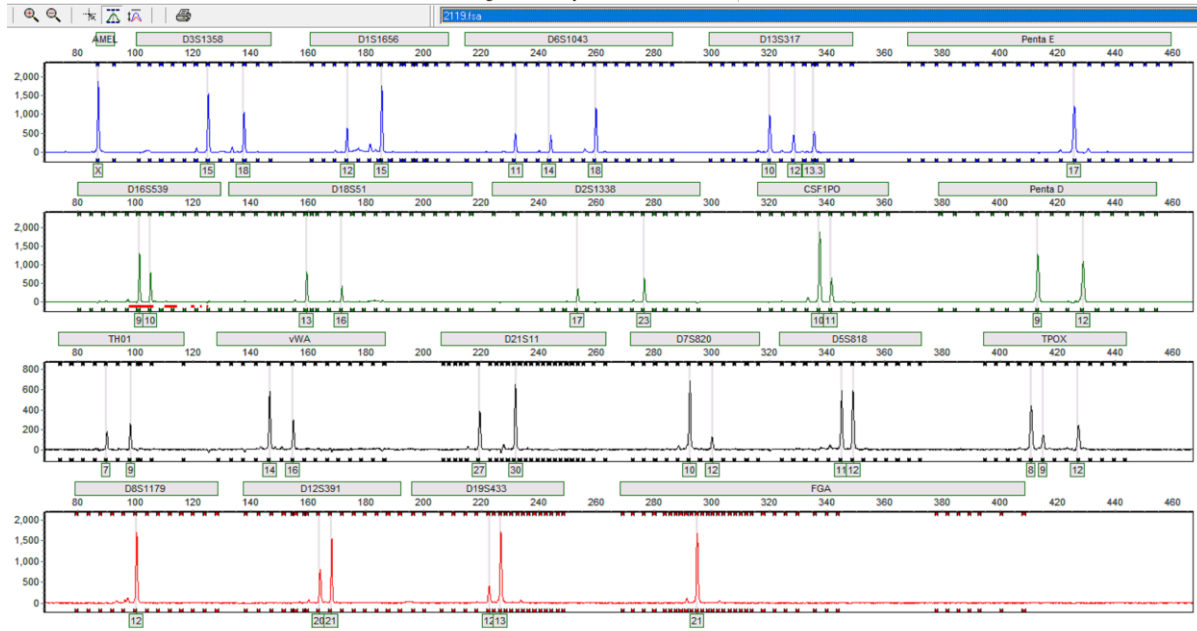

Table 1. STR profiles of 5-8F cell line

|         | Allele1 | Allele2 | Allele3 |
|---------|---------|---------|---------|
| AMEL    | x       |         |         |
| D3S1358 | 15      | 18      |         |
| D1S1656 | 12      | 15      |         |
| D6S1043 | 11      | 14      | 18      |
| D13S317 | 10      | 12      | 13.3    |
| Penta E | 17      |         |         |
| D16S539 | 9       | 10      |         |
| D18S51  | 13      | 16      |         |
| D2S1338 | 17      | 23      |         |
| CSF1PO  | 10      | 11      |         |
| Penta D | 9       | 12      |         |
| TH01    | 7       | 9       |         |
| vWA     | 14      | 16      |         |
| D21S11  | 27      | 30      |         |
| D7S820  | 10      | 12      |         |
| D5S818  | 11      | 12      |         |
| TPOX    | 8       | 9       | 12      |
| D8S1179 | 12      |         |         |
| D12S391 | 20      | 21      |         |
| D19S433 | 12      | 13      |         |
| FGA     | 21      |         |         |

Figure 2. Search result in ATCC database

## SEARCH THE STR DATABASE

As part of our continuing efforts to characterize and authenticate the cell lines in the Cell Biology collection, ATCC has developed a comprehensive database of short tandem repeat (STR) DNA profiles for all of our human cell lines. [View our brief tutorial before starting.](#)

1. [STR Profiling Analysis](#)
2. [Matching Algorithm](#)
3. [Interrogating the Database](#)

Showing 1 - 20 Of 20

Page Size: 100 ▼

| Add to Cart              | %Match | ATCC® Number | Designation                      | D5S818 | D13S317 | D7S820 | D16S539 | vWA   | TH01 | AMEL | TPOX | CSF1PO |
|--------------------------|--------|--------------|----------------------------------|--------|---------|--------|---------|-------|------|------|------|--------|
| <input type="checkbox"/> | 92.0   | CRL-3296     | MP38Uveal MelanomaHuman          | 12     | 12      | 10,12  | 9       | 14,17 | 7,9  | X    | 8    | 11     |
| <input type="checkbox"/> | 86.0   | CCL-13       | Chang LiverHeLa ContaminantHuman | 12     | 12,13.3 | 8,12   | 9,10    | 16,18 | 7    | X    | 8,12 | 10     |
| <input type="checkbox"/> | 86.0   | CCL-21       | AV-3AmnionHuman                  | 11,12  | 13.3    | 12     | 9,10    | 16,18 | 7    | X    | 8,12 | 9,10   |
| <input type="checkbox"/> | 81.0   | CCL-2        | HeLaCervical AdenocarcinomaHuman | 11,12  | 12,13.3 | 8,12   | 9,10    | 16,18 | 7    | X    | 8,12 | 9,10   |

Figure 3. Search result in DSMZ database

| Result of STR matching analysis by your data.                 |                   |           |             |              |        |         |        |      |      |          |         |
|---------------------------------------------------------------|-------------------|-----------|-------------|--------------|--------|---------|--------|------|------|----------|---------|
| - DSMZ Profile Database -                                     |                   |           |             |              |        |         |        |      |      |          |         |
| A graphical presentation is shown at the bottom of this page. |                   |           |             |              |        |         |        |      |      |          |         |
| EV                                                            | Cell No.          | Cell name | Locus names |              |        |         |        |      |      |          | Figures |
|                                                               |                   |           | D5S818      | D13S317      | D7S820 | D16S539 | VWA    | TH01 | AM   | TPOX     |         |
|                                                               | Query (Your Cell) |           | 11, 12      | 10, 12, 13.3 | 10, 12 | 9, 10   | 14, 16 | 7, 9 | x, x | 8, 9, 12 | 10, 11  |

Figure 4. Authentication of the species of the sample

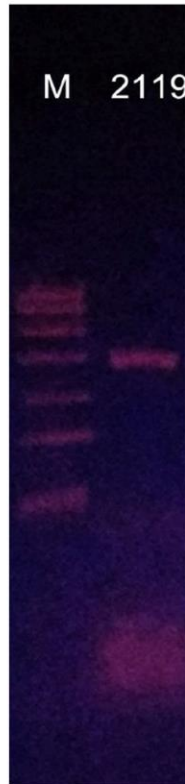

M: Marker. As the size of 700, 600, 500, 400, 300, 200 and 100bp from up to down.

Nine species are checked, as follow: *Homo sapiens* 391bp, *Cricetulus griseus* 315bp, *Macaca mulatta* 287bp, *Cercopithecus aethiops* 222bp, *Rattus norvegicus* 196bp, *Canis familiaris* 172bp, *Mus musculus* 150bp, *Bos Taurus* 102bp, IC 70bp

JD2119: The sample. The band size is 391bp which matches the size of human.
